# Supplementary material
Source: ML conference proceedings conference paper supplement (https://proceedings.mlr.press/v37/narayan15.html)
Supplement: Supplementary file [file narayan15-supp.pdf]

---

## Supplementary Materials: Alpha-Beta Divergences Discover Micro and Macro Structures in Data

---

We first discuss details regarding continuity in Alpha-Beta SNE which allow us to make settings, e.g.,  $(\alpha, \alpha + \beta) = (1, 1)$  used in t-SNE, while bypassing issues arising from singularity. We then display a smattering of ABSNE plots across a large selection of datasets.

### 1. Continuity and Gradients for the Alpha-Beta Objective

The form of the original Alpha-Beta divergence used in the paper, defined  $\mathcal{J}(\mathcal{E}; \alpha, \beta) = D_{AB}^{\alpha\beta}(\mathbf{P} \parallel \mathbf{Q})$ , is computed as:

$$\frac{1}{\alpha\beta} \sum_{i \neq j} \left( -\mathbf{P}_{ij}^\alpha \mathbf{Q}_{ij}^\beta + \frac{\alpha}{\alpha + \beta} \mathbf{P}_{ij}^{\alpha+\beta} + \frac{\beta}{\alpha + \beta} \mathbf{Q}_{ij}^{\alpha+\beta} \right), \quad (1)$$

where  $\alpha \in \mathbb{R} \setminus \{0\}$ ,  $\beta \in \mathbb{R}$  are hyperparameters. According to (Cichocki et al., 2011), to account for cases such as  $\beta = 0$  and  $\alpha + \beta = 0$  in this objective, we can re-define:

$$D_{AB}^{\alpha\beta}(\mathbf{P} \parallel \mathbf{Q}) = \sum_{ij} d_{AB}^{(\alpha,\beta)}(\mathbf{P}_{ij}, \mathbf{Q}_{ij}), \quad (2)$$

where:

$$d_{AB}^{(\alpha,\beta)}(\mathbf{P}_{ij}, \mathbf{Q}_{ij}) = \begin{cases} -\frac{1}{\alpha\beta} \left( \mathbf{P}_{ij}^\alpha \mathbf{Q}_{ij}^\beta - \frac{\alpha}{\alpha + \beta} \mathbf{P}_{ij}^{\alpha+\beta} - \frac{\alpha}{\alpha + \beta} \mathbf{Q}_{ij}^{\alpha+\beta} \right), & \alpha, \beta, \alpha + \beta \neq 0 \\ \frac{1}{\alpha^2} \left( \mathbf{P}_{ij}^\alpha \ln \frac{\mathbf{P}_{ij}^\alpha}{\mathbf{Q}_{ij}^\alpha} - \mathbf{P}_{ij}^\alpha + \mathbf{Q}_{ij}^\alpha \right), & \alpha \neq 0, \beta = 0 \\ \frac{1}{\alpha^2} \left( \ln \frac{\mathbf{Q}_{ij}^\alpha}{\mathbf{P}_{ij}^\alpha} + \frac{\mathbf{P}_{ij}^\alpha}{\mathbf{Q}_{ij}^\alpha} - 1 \right), & \alpha = -\beta \neq 0 \\ \frac{1}{\beta^2} \left( \mathbf{Q}_{ij}^\beta \ln \frac{\mathbf{Q}_{ij}^\beta}{\mathbf{P}_{ij}^\beta} + \mathbf{P}_{ij}^\beta \right), & \alpha = 0, \beta \neq 0 \\ \frac{1}{2} (\ln \mathbf{P}_{ij} - \ln \mathbf{Q}_{ij})^2, & \alpha = \beta = 0 \end{cases} \quad (3)$$

As described in the paper, note that we obtain the KL-divergence by setting  $\alpha = 1, \beta = 0$  and the Itakura-Saito divergence by setting  $\alpha = 1, \beta = -1$ , since  $\mathbf{P}$  and  $\mathbf{Q}$  are probability distributions. Given these various definitions, we would like to ensure that the gradient described in the paper is the same particularly for the first three cases (namely where  $\alpha \neq 0$ ), as these are the ones that arise in our reductions. Specifically, we need to ensure that the gradients  $\partial D_{AB}^{(\alpha,\beta)}(\mathbf{P} \parallel \mathbf{Q}) / \partial \mathbf{y}_i$  all match.

**Case 1:**  $\alpha, \beta \neq 0$ . We have that:

$$\frac{\partial D_{AB}^{(\alpha, \beta)}(\mathbf{P} \parallel \mathbf{Q})}{\partial \mathbf{y}_i} = \frac{\partial}{\partial \mathbf{y}_i} \left[ -\frac{1}{\alpha\beta} \left( \mathbf{P}_{ij}^\alpha \mathbf{Q}_{ij}^\beta - \frac{\alpha}{\alpha+\beta} \mathbf{P}_{ij}^{\alpha+\beta} - \frac{\beta}{\alpha+\beta} \mathbf{Q}_{ij}^{\alpha+\beta} \right) \right] \quad (4)$$

$$= \frac{\partial}{\partial \mathbf{y}_i} \left[ -\frac{1}{\alpha\beta} \mathbf{P}_{ij}^\alpha \mathbf{Q}_{ij}^\beta + \frac{1}{\alpha(\alpha+\beta)} \mathbf{Q}_{ij}^{\alpha+\beta} \right] \quad (5)$$

$$= \frac{\partial \mathbf{Q}_{ij}}{\partial \mathbf{y}_i} \cdot \left[ -\frac{1}{\alpha\beta} \mathbf{P}_{ij}^\alpha \cdot \beta \cdot \mathbf{Q}_{ij}^{\beta-1} + \frac{1}{\alpha(\alpha+\beta)} \cdot (\alpha+\beta) \cdot \mathbf{Q}_{ij}^{\alpha+\beta-1} \right] \quad (6)$$

$$= \frac{\partial \mathbf{Q}_{ij}}{\partial \mathbf{y}_i} \cdot \left[ -\frac{1}{\alpha} \mathbf{P}_{ij}^\alpha \cdot \mathbf{Q}_{ij}^{\beta-1} + \frac{1}{\alpha} \cdot \mathbf{Q}_{ij}^{\alpha+\beta-1} \right] \quad (7)$$

$$= -\frac{1}{\alpha} \cdot \frac{\partial \mathbf{Q}_{ij}}{\partial \mathbf{y}_i} \cdot \left[ \mathbf{P}_{ij}^\alpha \mathbf{Q}_{ij}^{\beta-1} - \mathbf{Q}_{ij}^{\alpha+\beta-1} \right] \quad (8)$$

In the remainder of the cases, we set  $\beta$  to the appropriate value to demonstrate that the gradients match.

**Case 2:**  $\alpha \neq 0, \beta = 0$ . We have that:

$$\frac{\partial D_{AB}^{(\alpha, \beta)}(\mathbf{P} \parallel \mathbf{Q})}{\partial \mathbf{y}_i} = \frac{\partial}{\partial \mathbf{y}_i} \left[ \frac{1}{\alpha^2} \left( \mathbf{P}_{ij}^\alpha \ln \frac{\mathbf{P}_{ij}^\alpha}{\mathbf{Q}_{ij}^\alpha} - \mathbf{P}_{ij}^\alpha + \mathbf{Q}_{ij}^\alpha \right) \right] \quad (9)$$

$$= \frac{\partial}{\partial \mathbf{y}_i} \left[ -\frac{1}{\alpha^2} \mathbf{P}_{ij}^\alpha \ln \mathbf{Q}_{ij}^\alpha + \frac{1}{\alpha^2} \mathbf{Q}_{ij}^\alpha \right] \quad (10)$$

$$= \frac{\partial \mathbf{Q}_{ij}}{\partial \mathbf{y}_i} \left[ -\frac{1}{\alpha^2} \mathbf{P}_{ij}^\alpha \cdot \alpha \mathbf{Q}_{ij}^{\alpha-1} \cdot \frac{1}{\mathbf{Q}_{ij}^\alpha} + \frac{1}{\alpha} \mathbf{Q}_{ij}^{\alpha-1} \right] \quad (11)$$

$$= \frac{\partial \mathbf{Q}_{ij}}{\partial \mathbf{y}_i} \left[ -\frac{1}{\alpha} \frac{\mathbf{P}_{ij}^\alpha}{\mathbf{Q}_{ij}^\alpha} + \frac{1}{\alpha} \mathbf{Q}_{ij}^{\alpha-1} \right] \quad (12)$$

$$= -\frac{1}{\alpha} \cdot \frac{\partial \mathbf{Q}_{ij}}{\partial \mathbf{y}_i} \cdot \left[ \frac{\mathbf{P}_{ij}^\alpha}{\mathbf{Q}_{ij}^\alpha} - \mathbf{Q}_{ij}^{\alpha-1} \right] \quad (13)$$

Setting  $\beta = 0$  in Equation (8), we observe that the gradients match, as desired.

**Case 3:**  $\alpha = -\beta \neq 0$ . We have that:

$$\frac{\partial D_{AB}^{(\alpha, \beta)}(\mathbf{P} \parallel \mathbf{Q})}{\partial \mathbf{y}_i} = \frac{\partial}{\partial \mathbf{y}_i} \left[ \frac{1}{\alpha^2} \left( \ln \frac{\mathbf{Q}_{ij}^\alpha}{\mathbf{P}_{ij}^\alpha} + \frac{\mathbf{P}_{ij}^\alpha}{\mathbf{Q}_{ij}^\alpha} - 1 \right) \right] \quad (14)$$

$$= \frac{\partial}{\partial \mathbf{y}_i} \left[ \frac{1}{\alpha^2} \left( \ln \mathbf{Q}_{ij}^\alpha + \frac{\mathbf{P}_{ij}^\alpha}{\mathbf{Q}_{ij}^\alpha} \right) \right] \quad (15)$$

$$= \frac{\partial \mathbf{Q}_{ij}}{\partial \mathbf{y}_i} \cdot \left[ \frac{1}{\alpha^2} \cdot \alpha \mathbf{Q}_{ij}^{\alpha-1} \cdot \frac{1}{\mathbf{Q}_{ij}^\alpha} + \frac{1}{\alpha^2} \cdot \mathbf{P}_{ij}^\alpha \cdot -\alpha \cdot \frac{1}{\mathbf{Q}_{ij}^{\alpha+1}} \right] \quad (16)$$

$$= -\frac{1}{\alpha} \cdot \frac{\partial \mathbf{Q}_{ij}}{\partial \mathbf{y}_i} \cdot \left[ \frac{\mathbf{P}_{ij}^\alpha}{\mathbf{Q}_{ij}^{\alpha+1}} - \frac{1}{\mathbf{Q}_{ij}^\alpha} \right] \quad (17)$$

Setting  $\beta = -\alpha$  in Equation (8), we again observe that the gradients match, as desired. It follows that for all cases in the paper that we explore, we can simply use the gradient in Equation (8).

## 2. Embedding Plots of Various Datasets

In Figures 1, 2 and 3 we showcase visualizations of datasets on which we presented some results in the main paper, but did not include plots due to lack of space.

These plots aim to show the impact of  $\alpha$  and  $\beta$  on qualitative properties of the embedding. As discussed in the paper: *changing  $\lambda$  should primarily affect global over local structure, where (i)  $\lambda < 1$  should lead to greater cluster separation*

|     |                                                                                                                                                                                                                                              |     |
|-----|----------------------------------------------------------------------------------------------------------------------------------------------------------------------------------------------------------------------------------------------|-----|
| 220 | <i>while (ii) <math>\lambda &gt; 1</math> should lead to low separation. Further, ABSNE should tend to produce lots of small, fine-grained clusters</i>                                                                                      | 275 |
| 221 | <i>for <math>\alpha &lt; 1</math> with few global changes in visualization while <math>\alpha &gt; 1</math> should lead to fewer, larger clusters with more global</i>                                                                       | 276 |
| 222 | <i>visualization changes.</i>                                                                                                                                                                                                                | 277 |
| 223 |                                                                                                                                                                                                                                              | 278 |
| 224 | We directly use pixels for the ORL and COIL-20 vision datasets, while we compute fc7 features yielded by Caffe's ImageNet model(Jia et al., 2014) for Caltech256. We use raw features for the other datasets. For all datasets with over 100 | 279 |
| 225 | dimensions, we first apply 100 dimensional PCA before computing neighborhood scores.                                                                                                                                                         | 280 |
| 226 |                                                                                                                                                                                                                                              | 281 |
| 227 |                                                                                                                                                                                                                                              | 282 |
| 228 | <b>References</b>                                                                                                                                                                                                                            | 283 |
| 229 |                                                                                                                                                                                                                                              | 284 |
| 230 | Cichocki, A., Cruces, S., and Amari, S. Generalized alpha-beta divergences and their application to robust nonnegative                                                                                                                       | 285 |
| 231 | matrix factorization. <i>Entropy</i> , 13:134–170, 2011.                                                                                                                                                                                     | 286 |
| 232 | Jia, Y., Shelhamer, E., Donahue, J., Karayev, S., Long, J., Girshick, R., Guadarrama, S., and Darrell, T. Caffe: Convolu-                                                                                                                    | 287 |
| 233 | tional architecture for fast feature embedding, 2014.                                                                                                                                                                                        | 288 |
| 234 |                                                                                                                                                                                                                                              | 289 |
| 235 |                                                                                                                                                                                                                                              | 290 |
| 236 |                                                                                                                                                                                                                                              | 291 |
| 237 |                                                                                                                                                                                                                                              | 292 |
| 238 |                                                                                                                                                                                                                                              | 293 |
| 239 |                                                                                                                                                                                                                                              | 294 |
| 240 |                                                                                                                                                                                                                                              | 295 |
| 241 |                                                                                                                                                                                                                                              | 296 |
| 242 |                                                                                                                                                                                                                                              | 297 |
| 243 |                                                                                                                                                                                                                                              | 298 |
| 244 |                                                                                                                                                                                                                                              | 299 |
| 245 |                                                                                                                                                                                                                                              | 300 |
| 246 |                                                                                                                                                                                                                                              | 301 |
| 247 |                                                                                                                                                                                                                                              | 302 |
| 248 |                                                                                                                                                                                                                                              | 303 |
| 249 |                                                                                                                                                                                                                                              | 304 |
| 250 |                                                                                                                                                                                                                                              | 305 |
| 251 |                                                                                                                                                                                                                                              | 306 |
| 252 |                                                                                                                                                                                                                                              | 307 |
| 253 |                                                                                                                                                                                                                                              | 308 |
| 254 |                                                                                                                                                                                                                                              | 309 |
| 255 |                                                                                                                                                                                                                                              | 310 |
| 256 |                                                                                                                                                                                                                                              | 311 |
| 257 |                                                                                                                                                                                                                                              | 312 |
| 258 |                                                                                                                                                                                                                                              | 313 |
| 259 |                                                                                                                                                                                                                                              | 314 |
| 260 |                                                                                                                                                                                                                                              | 315 |
| 261 |                                                                                                                                                                                                                                              | 316 |
| 262 |                                                                                                                                                                                                                                              | 317 |
| 263 |                                                                                                                                                                                                                                              | 318 |
| 264 |                                                                                                                                                                                                                                              | 319 |
| 265 |                                                                                                                                                                                                                                              | 320 |
| 266 |                                                                                                                                                                                                                                              | 321 |
| 267 |                                                                                                                                                                                                                                              | 322 |
| 268 |                                                                                                                                                                                                                                              | 323 |
| 269 |                                                                                                                                                                                                                                              | 324 |
| 270 |                                                                                                                                                                                                                                              | 325 |
| 271 |                                                                                                                                                                                                                                              | 326 |
| 272 |                                                                                                                                                                                                                                              | 327 |
| 273 |                                                                                                                                                                                                                                              | 328 |
| 274 |                                                                                                                                                                                                                                              | 329 |

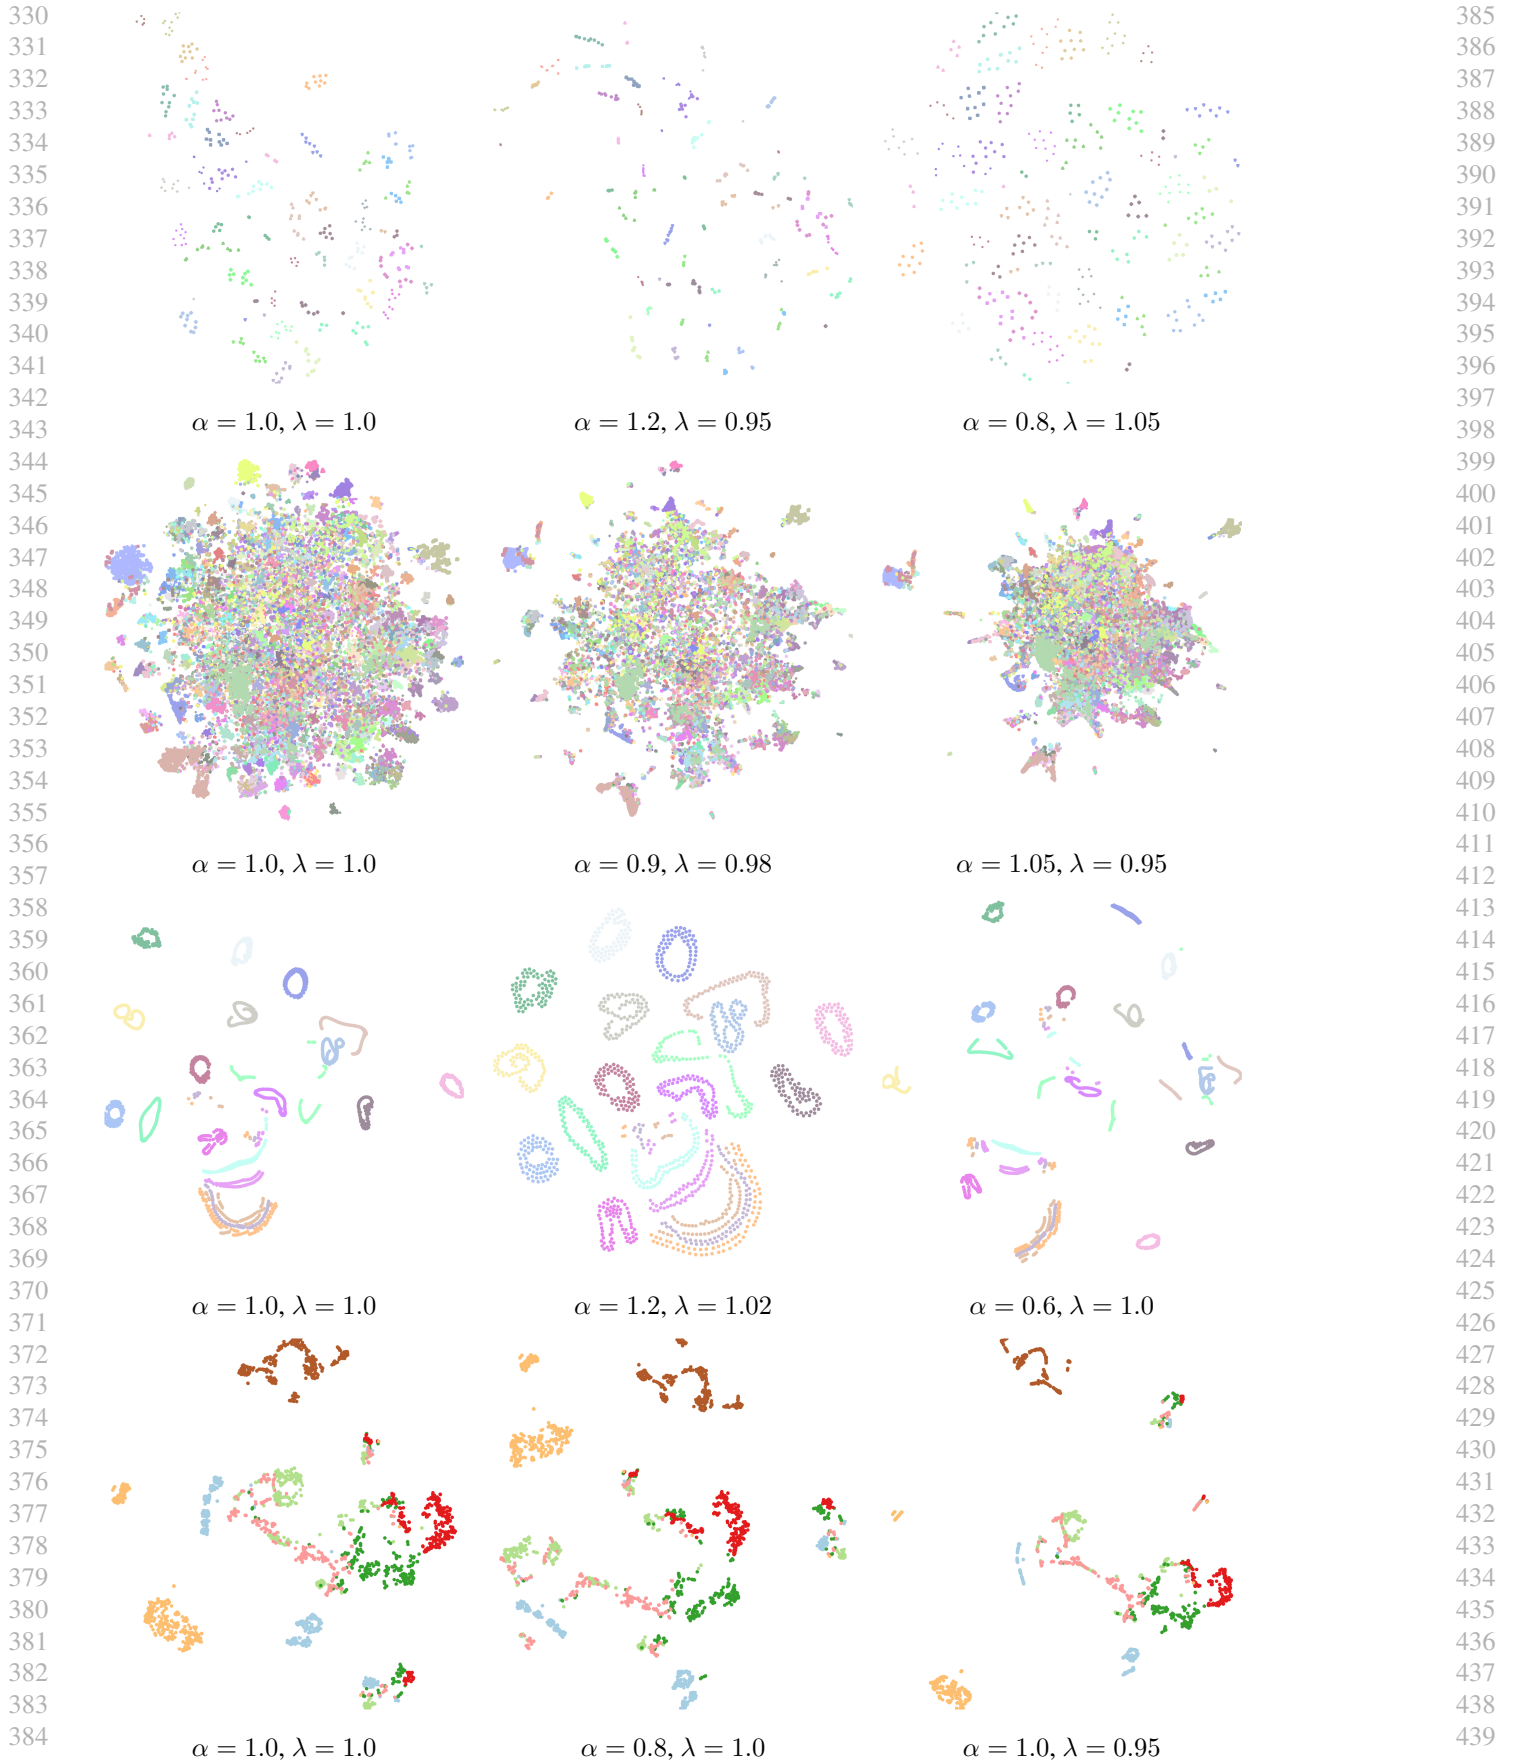

Figure 1. ABSNE visualizations for (rows from the top) ATT-Faces, Caltech256, COIL20, Segmentation Datasets. The left column corresponds to t-SNE. The center and right column contain visualizations with  $\alpha$  and  $\lambda$  set manually to emphasize local or global clustering. These two parameters can be used by a data scientist for goal-driven exploratory data visualization.

440  
441  
442  
443  
444  
445  
446  
447  
448  
449  
450  
451  
452  
453  
454  
455  
456  
457  
458  
459  
460  
461  
462  
463  
464  
465  
466  
467  
468  
469  
470  
471  
472  
473  
474  
475  
476  
477  
478  
479  
480  
481  
482  
483  
484  
485  
486  
487  
488  
489  
490  
491  
492  
493  
494

495  
496  
497  
498  
499  
500  
501  
502  
503  
504  
505  
506  
507  
508  
509  
510  
511  
512  
513  
514  
515  
516  
517  
518  
519  
520  
521  
522  
523  
524  
525  
526  
527  
528  
529  
530  
531  
532  
533  
534  
535  
536  
537  
538  
539  
540  
541  
542  
543  
544  
545  
546  
547  
548  
549

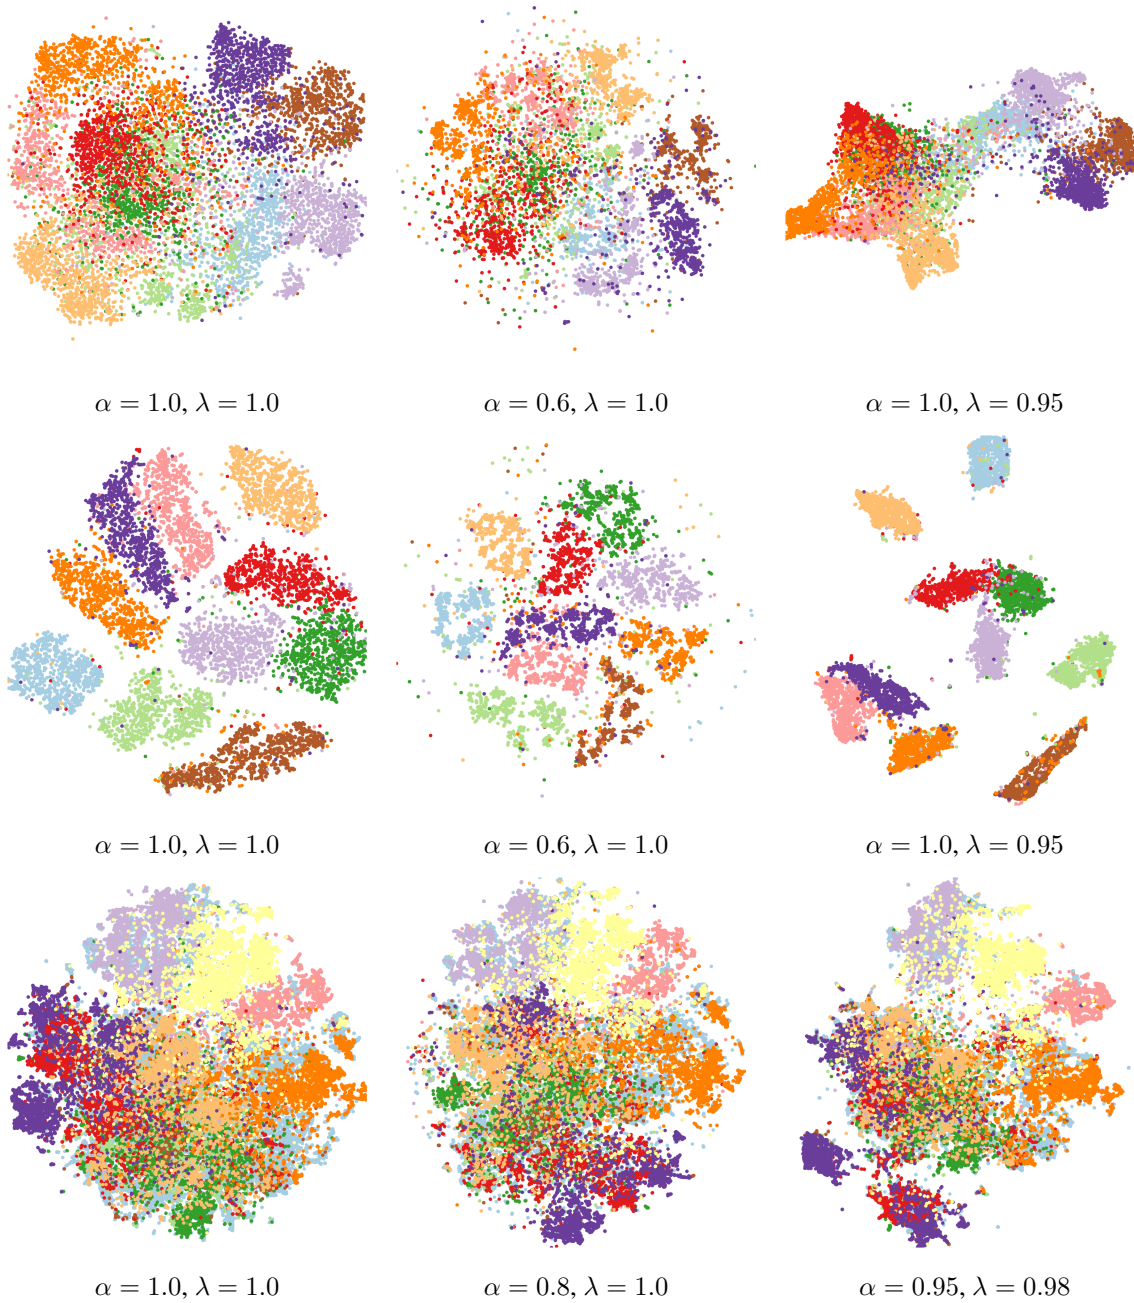

Figure 2. ABSNE visualizations for (rows from the top) CIFAR10, MNIST, ILSVRC2012 (validation) Datasets. The left column corresponds to t-SNE. The center and right column contain visualizations with  $\alpha$  and  $\lambda$  set manually to emphasize local or global clustering. These two parameters can be used by a data scientist for goal-driven exploratory data visualization.

550  
551  
552  
553  
554  
555  
556  
557  
558  
559  
560  
561  
562  
563  
564  
565  
566  
567  
568  
569  
570  
571  
572  
573  
574  
575  
576  
577  
578  
579  
580  
581  
582  
583  
584  
585  
586  
587  
588  
589  
590  
591  
592  
593  
594  
595  
596  
597  
598  
599  
600  
601  
602  
603  
604

605  
606  
607  
608  
609  
610  
611  
612  
613  
614  
615  
616  
617  
618  
619  
620  
621  
622  
623  
624  
625  
626  
627  
628  
629  
630  
631  
632  
633  
634  
635  
636  
637  
638  
639  
640  
641  
642  
643  
644  
645  
646  
647  
648  
649  
650  
651  
652  
653  
654  
655  
656  
657  
658  
659

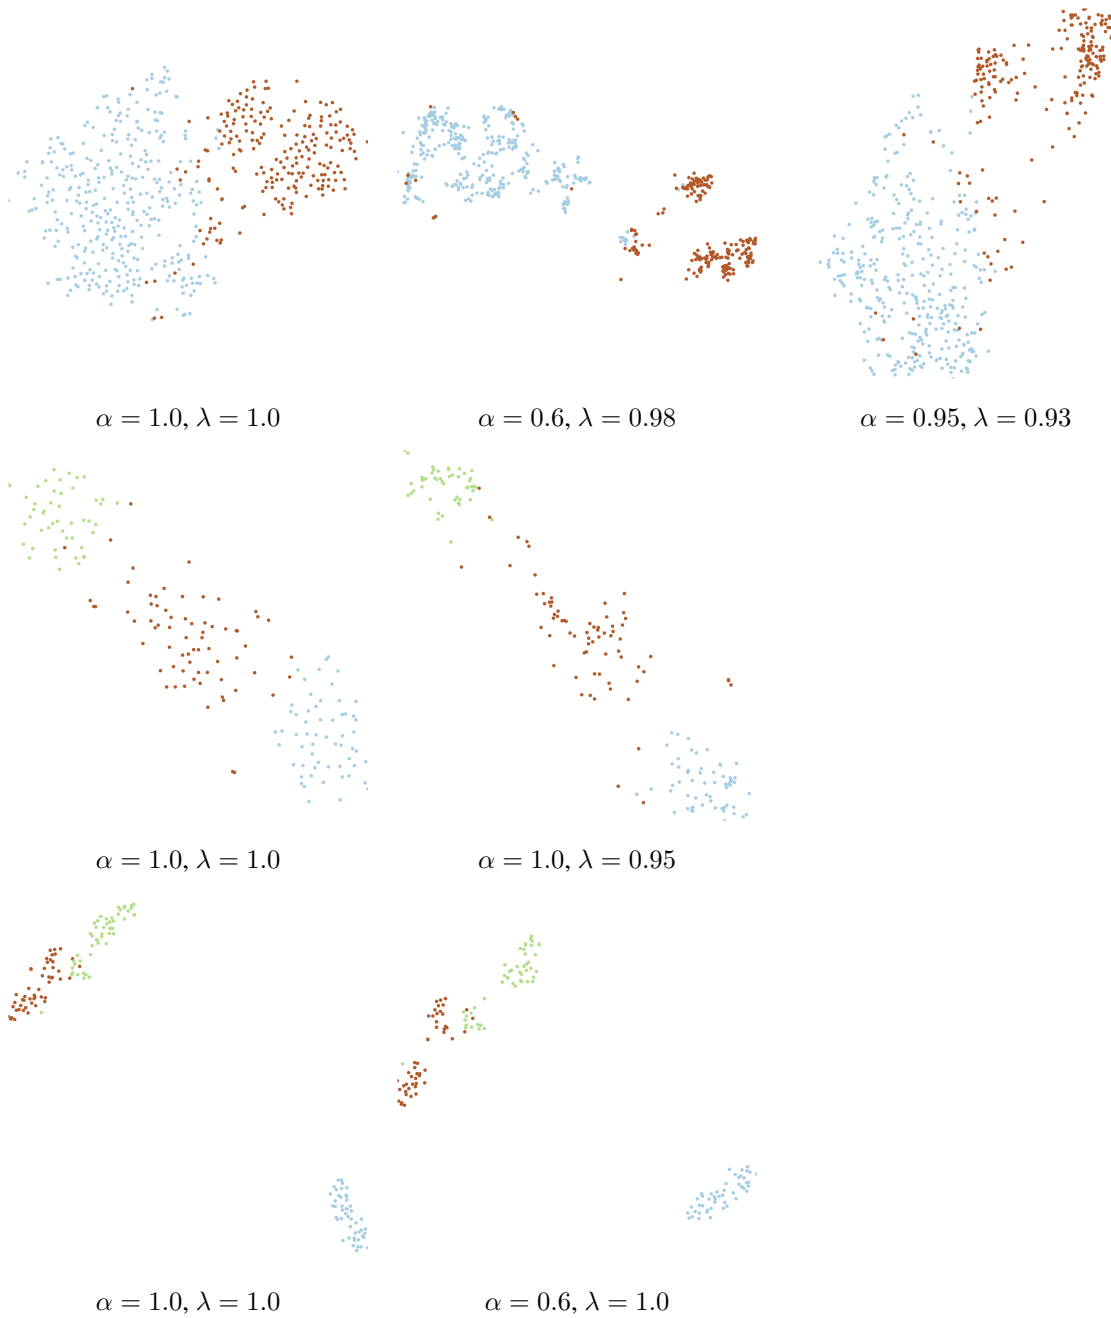

Figure 3. BSNE visualizations for (rows from the top) WDBC, WINE, IRIS Datasets. The left column corresponds to t-SNE. The center and right column contain visualizations with  $\alpha$  and  $\lambda$  set manually to emphasize local or global clustering. WINE and IRIS are very small datasets with clear clusters, and ABSNE plots do not differ widely from t-SNE
